# Supplementary material
Source: PubMed Central journal article supplement (PMC6441733)
Supplement: NIHMS1002899-supplement-Suppl_T1-T2.pdf [file NIHMS1002899-supplement-Suppl_T1-T2.pdf]

Table S1. Effects of O, N, and E personality traits on age of death in simultaneous latent growth model and Cox proportional hazard model.

| Model Parameters                   | Openness |       | Neuroticism |       | Extraversion |       |
|------------------------------------|----------|-------|-------------|-------|--------------|-------|
|                                    | Estimate | SE    | Estimate    | SE    | Estimate     | SE    |
| <i>Survival Estimates</i>          |          |       |             |       |              |       |
| Intercept $b_{h,I}$                | -0.01    | 0.01  | 0.04        | 0.02  | 0.002        | 0.02  |
| Slope $b_{h,S}$                    | -0.30*   | 0.11  | -0.06       | 0.24  | -0.30        | 0.23  |
| Sex $b_{h,sex}$                    | -0.44*   | 0.08  | -0.46*      | 0.07  | -0.45*       | 0.07  |
| Primary education (Ref.)           | -        | -     | -           | -     | -            | -     |
| Lower secondary $b_{h,educ}$       | -0.11    | 0.09  | -0.14       | 0.08  | -0.15        | 0.08  |
| Upper secondary $b_{h,educ}$       | 0.04     | 0.15  | 0.07        | 0.13  | -0.03        | 0.16  |
| Tertiary $b_{h,educ}$              | -0.24    | 0.17  | -0.18       | 0.14  | -0.25        | 0.15  |
| Entry Age $b_{h,age}$              | 0.11*    | 0.01  | 0.10*       | 0.01  | 0.11*        | 0.01  |
| <i>Growth Model Fixed Effects</i>  |          |       |             |       |              |       |
| Intercept @ 65                     | 17.13*   | 0.57  | 1.55*       | 0.32  | 5.96*        | 0.31  |
| Slope/decade                       | -0.46    | 0.42  | 0.84*       | 0.26  | -0.75*       | 0.21  |
| Quadratic/decade                   | 0.31     | 0.23  | 0.17        | 0.13  | -0.02        | 0.10  |
| Sex                                | 0.27     | 0.21  | 0.60*       | 0.11  | -0.53        | 0.11  |
| Sex*Slope                          | 0.03     | 0.09  | 0.06        | 0.05  | -0.03        | 0.05  |
| Sex*Quadratic                      | -0.12    | 0.09  | 0.01        | 0.05  | -0.04        | 0.05  |
| Primary education (Ref)            | -        | -     | -           | -     | -            | -     |
| Lower secondary                    | 1.76*    | 0.23  | -0.14       | 0.13  | 0.10         | 0.13  |
| Upper secondary                    | 2.63*    | 0.38  | -0.25*      | 0.19  | 0.34         | 0.19  |
| Tertiary                           | 3.88*    | 0.39  | -0.36*      | 0.19  | 0.21         | 0.22  |
| Lower secondary*Slope              | 0.11     | 0.10  | -0.09       | 0.06  | -0.02        | 0.05  |
| Upper secondary*Slope              | -0.01    | 0.01  | -0.05       | 0.11  | -0.18        | 0.11  |
| Tertiary*Slope                     | 0.07     | 0.18  | -0.01       | 0.08  | -0.18        | 0.08  |
| Lower secondary*Quadratic          | -0.14    | 0.11  | 0.04        | 0.06  | -0.05        | 0.05  |
| Upper secondary*Quadratic          | -0.17    | 0.11  | -0.01       | 0.09  | -0.18        | 0.09  |
| Tertiary*Quadratic                 | -0.22    | 0.15  | -0.002      | 0.08  | -0.04        | 0.08  |
| Entry Age                          | -0.002   | 0.01  | 0.02*       | 0.01  | -0.02*       | 0.01  |
| Entry Age*Slope                    | 0.002    | 0.01  | -0.02*      | 0.004 | 0.02*        | 0.004 |
| Entry Age*Quadratic                | -0.01*   | 0.004 | 0.003       | 0.002 | -0.004*      | 0.002 |
| <i>Growth Model Random Effects</i> |          |       |             |       |              |       |
| $\sigma^2_{Intercept}$             | 11.45*   | 0.54  | 3.58*       | 0.18  | 3.58*        | 0.13  |

|                                       |        |      |        |      |        |      |
|---------------------------------------|--------|------|--------|------|--------|------|
| $\sigma^2_{\text{Slope}}$             | 0.78*  | 0.15 | 0.27*  | 0.05 | 0.27*  | 0.04 |
| $\sigma^2_{\text{Quadratic}}$         | 0.38*  | 0.10 | 0.10*  | 0.03 | 0.05*  | 0.02 |
| $\sigma(\text{Intercept, Slope})$     | -0.17  | 0.19 | -0.10  | 0.06 | -0.20* | 0.04 |
| $\sigma(\text{Intercept, Quadratic})$ | -0.67* | 0.19 | -0.38* | 0.07 | -0.37* | 0.05 |
| $\sigma(\text{Slope, Quadratic})$     | 0.43*  | 0.10 | 0.05*  | 0.02 | 0.03*  | 0.01 |
| $\sigma^2_{\text{Residual}}$          | 4.98   | 0.18 | 1.56*  | 0.05 | 1.42   | 0.04 |

---

*Note.* Asterisk (\*) indicates statistically significant estimate ( $p < .05$ ).

Table S2. Effects of O, N, and E personality traits on age of death in simultaneous latent growth model and Cox proportional hazard mode that include time-varying physical, psychological, and cognitive health covariates.

| Model Parameters                  | Openness |       | Neuroticism |       | Extraversion |       |
|-----------------------------------|----------|-------|-------------|-------|--------------|-------|
|                                   | Estimate | SE    | Estimate    | SE    | Estimate     | SE    |
| <i>Survival Estimates</i>         |          |       |             |       |              |       |
| Intercept $b_{h,I}$               | -0.01    | 0.01  | 0.01        | 0.03  | 0.01         | 0.02  |
| Slope $b_{h,S}$                   | -0.29*   | 0.11  | -0.09       | 0.39  | -0.37        | 0.23  |
| Sex $b_{h,sex}$                   | -0.43*   | 0.08  | -0.44*      | 0.07  | -0.45*       | 0.07  |
| Primary education (Ref.)          | -        | -     | -           | -     | -            | -     |
| Lower secondary $b_{h,educ}$      | -0.12    | 0.09  | -0.13       | 0.08  | -0.17        | 0.08  |
| Upper secondary $b_{h,educ}$      | 0.01     | 0.15  | 0.07        | 0.13  | -0.06        | 0.16  |
| Tertiary $b_{h,educ}$             | -0.28    | 0.17  | -0.18       | 0.14  | -0.29        | .157  |
| Entry Age $b_{h,age}$             | 0.10*    | 0.01  | 0.10*       | 0.01  | 0.11*        | 0.01  |
| <i>Growth Model Fixed Effects</i> |          |       |             |       |              |       |
| Intercept @ 65                    | 16.87*   | 0.80  | -1.01*      | 0.40  | 7.13*        | 0.41  |
| Slope/decade                      | 0.03     | 0.55  | -0.07       | 0.28  | -0.38        | 0.27  |
| Quadratic/decade                  | 0.32     | 0.23  | 0.13        | 0.12  | -0.04        | 0.10  |
| Sex                               | 0.30     | 0.20  | 0.45*       | 0.10  | -0.48*       | 0.10  |
| Sex*Slope                         | 0.03     | 0.09  | 0.01        | 0.05  | -0.01        | 0.05  |
| Sex*Quadratic                     | -0.13    | 0.09  | -0.002      | 0.05  | -0.04        | 0.05  |
| Primary education (Ref.)          | -        | -     | -           | -     | -            | -     |
| Lower secondary                   | 1.67*    | 0.23  | -0.04       | 0.11  | 0.06         | 0.12  |
| Upper secondary                   | 2.60*    | 0.37  | -0.17*      | 0.15  | 0.31         | 0.18  |
| Tertiary                          | 3.60*    | 0.39  | -0.09*      | 0.17  | 0.08         | 0.22  |
| Lower secondary*Slope             | 0.06     | 0.11  | -0.02       | 0.05  | -0.06        | 0.05  |
| Upper secondary*Slope             | -0.10    | 0.17  | 0.02        | 0.10  | -0.23*       | 0.11  |
| Tertiary*Slope                    | 0.08     | 0.19  | 0.05        | 0.08  | -0.25*       | 0.08  |
| Lower secondary*Quadratic         | -0.14    | 0.11  | 0.04        | 0.06  | -0.05        | 0.05  |
| Upper secondary*Quadratic         | -0.20    | 0.14  | 0.01        | 0.08  | -0.20*       | 0.08  |
| Tertiary*Quadratic                | -0.22    | 0.15  | -0.050      | 0.08  | -0.04        | 0.08  |
| Entry Age                         | 0.002    | 0.01  | 0.05*       | 0.01  | -0.03*       | 0.01  |
| Entry Age*Slope                   | -0.010   | 0.01  | -0.01*      | 0.010 | 0.01*        | 0.01  |
| Entry Age*Quadratic               | -0.01*   | 0.004 | 0.001       | 0.002 | -0.003       | 0.002 |

*Growth Model Random Effects*

|                                          |        |      |        |      |        |      |
|------------------------------------------|--------|------|--------|------|--------|------|
| $\sigma^2_{\text{Intercept}}$            | 11.09* | 0.53 | 2.58*  | 0.15 | 3.37*  | 0.13 |
| $\sigma^2_{\text{Slope}}$                | 0.75*  | 0.15 | 0.21*  | 0.04 | 0.24*  | 0.03 |
| $\sigma^2_{\text{Quadratic}}$            | 0.37*  | 0.09 | 0.08*  | 0.03 | 0.04*  | 0.02 |
| $\sigma_{\text{(Intercept, Slope)}}$     | -0.27  | 0.18 | -0.11* | 0.05 | -0.20* | 0.04 |
| $\sigma_{\text{(Intercept, Quadratic)}}$ | -0.60* | 0.18 | -0.28* | 0.06 | -0.30* | 0.05 |
| $\sigma_{\text{(Slope, Quadratic)}}$     | 0.44*  | 0.09 | 0.04*  | 0.02 | 0.02   | 0.01 |
| $\sigma^2_{\text{Residual}}$             | 4.97   | 0.18 | 1.48*  | 0.05 | 1.41*  | 0.04 |

*Note.* asterisk (\*) indicates statistically significant estimate ( $p < .05$ ). Parameter estimates are based on model fitting results identical to parameter estimates presented in Supplemental Table 1 except that estimates are adjusted for time-varying effects of physical, psychological, and cognitive covariates on O, N, and E personality traits.
